# Supplementary material for: Protocol for a population-based study of rheumatic heart disease prevalence and cardiovascular outcomes among schoolchildren in Nepal
Source: PubMed Central journal article supplement — BMJ Open. 2012 Jun 8;2(3):e001320. doi: 10.1136/bmjopen-2012-001320 (PMC3371575; doi:10.1136/bmjopen-2012-001320), 2012-06-08
Supplement: bmjopen-2012-001320.draft_revisions.pdf [file bmjopen-2012-001320.draft_revisions.pdf]

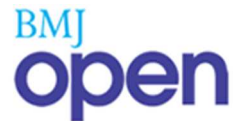

**Rheumatic Heart disease: Rationale and Design of a  
Population-Based Study Protocol of Prevalence and  
Cardiovascular Outcomes among Schoolchildren in Nepal**

|                                 |                                                                                                                                                                                                                                                                                                                                                     |
|---------------------------------|-----------------------------------------------------------------------------------------------------------------------------------------------------------------------------------------------------------------------------------------------------------------------------------------------------------------------------------------------------|
| Journal:                        | <i>BMJ Open</i>                                                                                                                                                                                                                                                                                                                                     |
| Manuscript ID:                  | bmjopen-2012-001320                                                                                                                                                                                                                                                                                                                                 |
| Article Type:                   | Protocol                                                                                                                                                                                                                                                                                                                                            |
| Date Submitted by the Author:   | 16-Apr-2012                                                                                                                                                                                                                                                                                                                                         |
| Complete List of Authors:       | Pilgrim, Thomas; Bern University Hospital, Kalesan, Bindu; Bern University Hospital, Karki, Prahlad; B.P. Koirala Institute of Health Sciences, Basnet, Anil; B.P. Koirala Institute of Health Sciences, Meier, Bernhard; Bern University Hospital, Urban, Philip; Hôpital de la Tour, Shrestha, Nikesh; B.P. Koirala Institute of Health Sciences, |
| <b>Primary Subject Heading</b>: | Cardiovascular medicine                                                                                                                                                                                                                                                                                                                             |
| Secondary Subject Heading:      | Epidemiology                                                                                                                                                                                                                                                                                                                                        |
| Keywords:                       | Echocardiography < CARDIOLOGY, Paediatric cardiology < CARDIOLOGY, Valvular heart disease < CARDIOLOGY                                                                                                                                                                                                                                              |
|                                 |                                                                                                                                                                                                                                                                                                                                                     |

SCHOLARONE™  
Manuscripts

# Rheumatic Heart disease: Rationale and Design of a Population-Based Study Protocol of Prevalence and Cardiovascular Outcomes among Schoolchildren in Nepal

Thomas Pilgrim, MD<sup>1\*</sup>, Bindu Kalesan, MPH<sup>1\*†</sup>, Prahlad Karki, MD<sup>‡</sup>, Anil Basnet, MD<sup>‡</sup>, Bernhard Meier, MD<sup>\*</sup>, Philip Urban, MD<sup>°</sup>, and Nikesh Raj Shrestha, MD<sup>‡</sup>

<sup>1</sup> equally contributing first authors

\*Department of Cardiology, Swiss Cardiovascular Center Bern, Bern University Hospital, Bern, Switzerland; †Clinical Trials Unit, Department of Social and Preventive Medicine, Bern University, Bern, Switzerland; ‡Department of Internal Medicine and Cardiology, B.P. Koirala Institute of Health Sciences, Dharan, Nepal; °Hôpital de la Tour, Geneva, Switzerland

ClinicalTrials.gov Identifier: NCT01550068

Keywords: rheumatic heart disease, screening, schoolchildren

Word Count: 3824

Corresponding Author:

Thomas Pilgrim, MD  
Department of Cardiology  
Bern University Hospital  
Freiburgstrasse 10  
CH-3010 Bern  
Switzerland  
Email: thomas.pilgrim@insel.ch  
Phone: +41 31 632 08 27  
Fax: +41 31 632 47 70

## Abstract

**Introduction:** Rheumatic heart disease (RHD) remains a major contributor to morbidity and mortality in developing countries. The reported prevalence rates of RHD are highly variable and mainly attributable to differences in the sensitivity of either clinical screening to detect advanced heart disease, or echocardiographic evaluation where disease is diagnosed earlier across a continuous spectrum. The clinical significance of diagnosis of subclinical RHD by echocardiographic screening and early implementation of secondary prevention has not been clearly established.

**Methods and Analysis:** We designed a cross-sectional survey to determine the prevalence of RHD in children from private and public schools between the age of 5 and 15 years in urban and rural areas of Eastern Nepal using both cardiac auscultation and echocardiographic evaluation. Children with RHD will be treated with secondary prevention and enrolled in a prospective cohort study. We will compare the prevalence rates by cardiac auscultation and echocardiography, determine risk factors associated with diagnosis and progression of RHD, investigate social and economic barriers for receiving adequate cardiac care, and assess clinical outcomes with regular medical surveillance as a function of stage of disease at the time of diagnosis. Prospective clinical studies investigating the impact of secondary prevention for subclinical RHD on long-term clinical outcome will be of central relevance for future health resource utilization in developing countries.

**Ethics and Dissemination:** The study was considered ethically uncritical and was given an exempt status by the ethics committee at University of Bern, Switzerland. The study has been submitted to the National Nepal Health Research Council (NHRC), and was registered with clinical trials.gov (NCT01550068). The study findings will be reported in peer-reviewed publications.

## Article Summary

### *Article focus:*

- Study potocol of a population-based evaluation of the prevalence rate of rheumatic heart disease (RHD) among schoolchildren in Eastern Nepal, with a subsequent prospective longitudinal cohort study assessing long-term clinical outcome of children undergoing secondary prevention for borderline and definite RHD according to the World Heart Federation criteria.

### *Key messages:*

- RHD remains a major contributor to morbidity and mortality in developing countries.
- Echocardiographic screening allows diagnosis of RHD at an earlier stage across a continuous spectrum as compared to cardiac auscultation.
- The clinical significance of diagnosis of subclinical RHD by echocardiographic screening and early implementation of secondary prevention has not been clearly established.

### *Strengths and limitations of this study:*

- The protocol describes a comprehensive approach to implement echocardiographic screening in a high prevalence region as recommended by the World Health Organization, and outlines a robust analysis plan to investigate clinical outcome with secondary prevention for subclinical RHD.
- Since access to education is a marker of socio-economic status, restriction of screening to school-going children is subjected to selection bias likely to underestimate the real disease burden related to RHD in Eastern Nepal.

- 1  
2  
3 - Cultural sensitivity with education programs and focus group discussions will  
4  
5 anticipate the potential social stigma of a diagnosis with a heart condition during  
6  
7  
8 childhood, and increase public awareness.  
9  
10  
11  
12  
13  
14  
15  
16  
17  
18  
19  
20  
21  
22  
23  
24  
25  
26  
27  
28  
29  
30  
31  
32  
33  
34  
35  
36  
37  
38  
39  
40  
41  
42  
43  
44  
45  
46  
47  
48  
49  
50  
51  
52  
53  
54  
55  
56  
57  
58  
59  
60

## Introduction

Rheumatic fever complicated by rheumatic heart disease (RHD) remains a major contributor to morbidity and premature death among the socio-economically underprivileged working age population of developing countries. [1] RHD results from an autoimmune response due to molecular mimicry between the M-protein on the group A  $\beta$ -hemolytic streptococci cell membrane and cardiac myosin eventually leading to valvular damage. [2] High prevalence rates of acute rheumatic fever (ARF) and RHD have been reported from different geographic regions around the world such as Southeast Asia, the Western Pacific and Africa that share demographic characteristics determined by poverty and limited access to health care resources. [3] The burden of RHD is likely to escalate in these countries due to increasing urbanization and overcrowding.

Prevalence rates of RHD from screening studies in Southeast Asian countries range from 0.7 to 22 per 1000 children using traditional cardiac auscultation, and from 20 to 51 per 1000 children using echocardiography [4-11]. A considerable variation in prevalence rates reflects the substantially higher sensitivity of echocardiographic screening as compared to cardiac auscultation due to diagnosis across a continuous spectrum of disease as opposed to presence or absence of a heart murmur using cardiac auscultation. Echocardiographic screening for RHD has been recommended by the World Health Organization (WHO) in high prevalence regions, [12] and the recently released criteria for echocardiographic diagnosis of RHD by the World Heart Federation (WHF) warrant consistent reporting and facilitate the evaluation of progression of minor echocardiographic lesions over time. [13] The diagnosis of RHD at an earlier, clinically silent stage by the detection of morphological and functional valvular lesions without a corresponding heart murmur challenges our current concept of prevention and treatment.

Medical management of ARF and RHD largely depends upon preventive measures comprising reduction of overcrowding, prompt antibiotic treatment of streptococcal pharyngitis, and secondary prevention achieved by regular oral or intramuscular administration of penicillin continued until early

1  
2  
3 adulthood among children with a documented history of ARF or evidence of RHD. Even though  
4  
5 preventive measures with penicillin are inexpensive and efficient, this strategy is difficult to  
6  
7 effectuate in developing countries with limited access to health care resources. Enrollment of  
8  
9 patients with ARF and RHD in a registry with close follow-up has been demonstrated to reduce the  
10  
11 cardiovascular sequelae associated with disease progression. [14]  
12

13  
14 Effective measures to reduce the global burden of RHD represent an ongoing challenge involving  
15  
16 reduction in overcrowding, improving hygiene, increasing public awareness and facilitating access to  
17  
18 health care. In the absence of fundamental socio-economic changes improving primordial  
19  
20 prevention, systematic screening for RHD based on public and private education represents the most  
21  
22 comprehensive approach and aims at a reduction of the late complications of RHD by early  
23  
24 implementation of secondary prevention. Current research has been predominantly focused on  
25  
26 assessing prevalence rates using passive survey systems without subsequent enrolment in registries  
27  
28 or offering longitudinal follow-up. In order to assess the determinants of disease and its progression  
29  
30 along with short- and long-term clinical outcomes, we plan to include all cases of RHD in a cohort  
31  
32 study to be treated according to their disease stage at diagnosis and followed up for at least 5 years.  
33  
34  
35  
36  
37  
38  
39

#### 40 **Aims and Objectives**

41  
42 The objective of this study is to investigate the prevalence rate of definite and borderline RHD among  
43  
44 children in Eastern Nepal, and to assess long-term clinical outcome of children undergoing secondary  
45  
46 antibiotic prevention for RHD. More specifically, we aim to (a) compare the prevalence rates by  
47  
48 cardiac auscultation and echocardiography, (b) determine risk factors associated with diagnosis and  
49  
50 progression of RHD, (c) investigate social and economic barriers for receiving adequate cardiac care,  
51  
52 and (d) assess clinical outcomes as a function of stage of disease at the time of diagnosis with regular  
53  
54 medical surveillance.  
55  
56  
57  
58  
59  
60

## Methods

### *Study Design and Setting*

A cross-sectional survey of schoolchildren in the Sunsari district of Eastern Nepal will be performed to identify children with RHD; and those with evidence of disease will subsequently be enrolled in a prospective longitudinal cohort study for a period of five years. The Sunsari district situated on the foothills of the Lower Himalayan Range in Eastern Nepal involves 52 villages with a total population of around 630,000 inhabitants. Dharan is the largest city in the Sunsari district and the third largest city in the country.

### *Cross-Sectional Survey*

We will perform clinical and echocardiographic screening of children aged 5-15 years from public and private schools in urban and rural areas in Eastern Nepal. The location and administration of the schools will be used as a surrogate to reflect the socio-economic demographic distribution of the population in Eastern Nepal. Since approximately eighty percent of the population in Nepal lives in rural areas, [15] we will include three rural and one urban area in Eastern Nepal, and enroll one third of the patients from the urban area from private schools.

### *Prospective Cohort Study*

All children with documented history of ARF and/or echocardiographic evidence of RHD will be re-examined in regular time intervals in the context of a prospective cohort study. Both children and their primary caregivers will be educated in order to ensure compliance with secondary prevention and regular follow-up. A standardized questionnaire will address clinical symptoms, compliance to treatment, and assess pre-specified clinical endpoints. Echocardiographic follow-up will be performed yearly up to five years at B.P. Koirala Institute of Health Sciences (BPKIHS).



### *Study Population*

For the cross-sectional survey, all parents of the schoolchildren will be informed by a letter distributed to the children outlining the project details and indicating a contact address for queries. Since close to half of the adult population in Nepal is illiterate, [15] focus group discussions with the health care providers, school principals, local health care workers and parents will be offered to understand and establish initiatives to win the confidence of the communities. A written informed consent form of the principal of each of the selected schools will be obtained. Schoolchildren of parents that do not actively withdraw consent for screening will be examined. Inclusion criteria for the observational survey will be as follows: age 5-15 years (1), written informed consent for participation in the screening study by the school principal (2), and passive consent from the parent/primary caregiver of the children (3). Given the observational design of the study no formal exclusion criteria apply. Children will be enrolled in the prospective registry in the presence of a documented history of ARF or echocardiographic evidence of definite or borderline RHD, and written informed consent given by the children and/or their parents/primary caregivers.

### *Data Collection*

A questionnaire customized to the age of the children will acquire data on social background and past medical history in a standardized interview. Demographic variables such as age, household characteristics, and socio-economic indicators will be recorded along with a short medical history followed by physical examination documenting height, weight, and potential clinical signs of ARF. Screening for RHD will be performed independently by cardiac auscultation to detect pathologic heart murmurs, as well as by echocardiography to document morphologic and/or functional valvular lesions consistent with RHD. All data will be recorded in a dedicated web-based database.

### *Treatment*

All patients enrolled in the RHD cohort will be treated with a standard antibiotic regimen for secondary prevention consisting of intramuscular administration of weight-adjusted penicillin G

1  
2  
3 benzathine every 3-4 weeks, or daily oral administration of penicillin V for the entire duration of  
4  
5 follow-up. Patients allergic to penicillin will be treated with daily oral administration of azithromycin.  
6  
7 [16]  
8  
9

### 10 *Definitions*

11  
12 ARF will be defined by the modified Jones criteria. [17] Echocardiographic diagnosis will classify RHD  
13  
14 according to the WHF criteria for individuals aged  $\leq 20$  years into definite and borderline. Definite  
15  
16 RHD is further subdivided into four subcategories. Subcategory A is pathological mitral regurgitation  
17  
18 and at least two morphological features of RHD of the mitral valve, subcategory B is the presence of  
19  
20 mitral stenosis with a mean gradient of  $\geq 4$  mmHg. Subcategory C is defined by pathological aortic  
21  
22 regurgitation in combination with at least two morphological features of RHD of the aortic valve, and  
23  
24 subcategory D is determined by borderline disease of both the aortic valve and the mitral valve.  
25  
26  
27 Borderline RHD is subdivided into three subcategories. Subcategory A is the presence of at least two  
28  
29 morphological features of RHD of the mitral valve without pathological mitral regurgitation or mitral  
30  
31 stenosis, subcategories B and C are determined by pathological mitral regurgitation, or pathological  
32  
33 aortic regurgitation, respectively. Physiological mitral regurgitation (A), physiological aortic  
34  
35 regurgitation (B), and an isolated morphological feature of RHD of the mitral or aortic valve (i.e.  
36  
37 valvular thickening) without any associated pathological stenosis or regurgitation (C and D,  
38  
39 respectively) will be classified as normal echocardiographic findings. [13]  
40  
41  
42

43  
44 A patient will be defined as adherent to secondary prevention if he/she receives at least 80% of the  
45  
46 prescribed intramuscular antibiotic administration captured from hospital records. In patients  
47  
48 receiving oral antibiotics, adherence will be assessed by self-report and by pill counts at every follow  
49  
50 up visit. Other treatment adherence end points will be frequency of follow-up appointments and  
51  
52 follow-up status.  
53  
54

55  
56 Quality of life will be assessed using PedsQL generic core and cardiac module scales. PedsQL  
57  
58 addresses the child's perspectives across the widest possible age range. The generic module scale  
59  
60

1  
2  
3 encompass physical functioning (8 items), emotional functioning (5 items), social functioning (5  
4 items), and school functioning (5 items). The PedsQL cardiac module has 5 scales related to  
5 symptoms (7 items), perceived physical appearance (3 items), treatment anxiety (4 items), cognitive  
6 problems (5 items), and communication (3 items). [18]  
7  
8  
9  
10

### 11 *Outcomes and Treatment Effect*

12  
13  
14 Clinical outcomes such as all-cause mortality, stroke, endocarditis, hospitalization for congestive  
15 heart failure, valvular surgery, mitral balloon valvuloplasty, and recurrence of rheumatic fever will be  
16 recorded among patients with RHD enrolled in the longitudinal cohort study. Additionally, we will  
17 obtain time varying covariates like socioeconomic parameters, adherence to treatment and  
18 information on quality of life.  
19  
20  
21  
22  
23  
24

### 25 *Quality Assurance*

26  
27  
28 All data will be checked for completeness and plausibility before being entered into a web-based  
29 data entry system. Positive screening results will be verified in the cardiology outpatient clinic of  
30 BPKIHS by complete echocardiographic examination. Regular monthly reports will be generated for  
31 patient follow up visits and clinical outcome assessment. Biannual reports will be submitted to the  
32 foundation “Coeur de la Tour” in Geneva, Switzerland. The study will be conducted in compliance  
33 with the Declaration of Helsinki.  
34  
35  
36  
37  
38  
39  
40  
41

42 The study was registered with clinical trials.gov (NCT01550068) and was given an exempt status by  
43 the ethics committee at University of Bern, Switzerland (KEK-BE 018/12). The study protocol has  
44 been submitted to the National Nepal Health Research Council (NHRC). The study is supported by an  
45 unrestricted grant from the foundation “Coeur de la Tour” (<http://www.coeurdelatour.ch>) from  
46 Geneva, Switzerland.  
47  
48  
49  
50  
51

### 52 *Statistical Considerations*

#### 53 *Sample Size*

1  
2  
3 Sample size calculations were based on reported prevalence rates of RHD using cardiac auscultation  
4  
5 in schoolchildren in Southeast Asian countries. [4-11] We calculated a sample size of 9500  
6  
7 schoolchildren between the ages of 5 to 15 years with a type I error of 0.05 and a power of 90% for  
8  
9 an expected diagnosis rate of 2 per 1000. The lower end of the prevalence estimates was chosen in  
10  
11 order to obtain a sufficient sample size in the subsequent cohort study, and to be able to provide  
12  
13 optimal treatment to a maximum number of affected children. We will include one urban and three  
14  
15 rural areas from the different parts of the target area (Sunsari district), thus including 2,500  
16  
17 participants in each area. One third of the patients from the urban area will be enrolled from private  
18  
19 schools.  
20

### 21 22 23 *Data Analysis Plan*

24  
25  
26 In the cross-sectional study, age and sex specific prevalence rates for RHD will be calculated by socio-  
27  
28 demographic covariates. The design effect of the cluster sampling strategy will then be calculated  
29  
30 using the variations of prevalence rates among the different clusters. [19] A multiplication factor  
31  
32 equal to the square root of the design effect will be used to construct the 95% confidence intervals  
33  
34 (CIs) for the prevalence estimates to avoid erroneously narrow confidence intervals (CI). Prevalence  
35  
36 rates with 95% CI will be calculated separately for the two screening methods. Multivariable analysis  
37  
38 will be performed for assessing the socio-economic factors for RHD. Among children with RHD, the  
39  
40 socio-economic barriers to receive adequate medical care will be assessed by using a multivariate  
41  
42 logistic regression model. Furthermore, the association of RHD with age, gender, socio-economic  
43  
44 status, and urban–rural residence will be evaluated with univariate and multivariate analyses.  
45  
46  
47

48  
49 Cohort baseline characteristics and procedural variables will be presented as counts and percentages  
50  
51 for dichotomous variables and as mean and standard deviation (SD) for continuous variables. Factor  
52  
53 analysis of the scales in QOL will be performed using appropriate rotations and index scores of the  
54  
55 constructs will be computed if not more than 25% of the items are missing. Adherence to treatment  
56  
57 will be measured as a dichotomous variable and quality of life (QOL) scores as mean (SD) / median  
58  
59  
60

1  
2  
3 (interquartile range) will be presented for each follow up time interval. We will present and compare  
4  
5 the baseline and procedural characteristics by the stages of disease progression at baseline using chi-  
6  
7 square tests or analyses of variance. Comparisons of the baseline characteristics of the study subjects  
8  
9 among the disease stages at baseline will be performed using linear or logistic regression. For the  
10  
11 specific clinical endpoints, compliance and QOL univariable and multivariable Cox proportional  
12  
13 hazard regression models will be used to calculate hazard ratios with 95% CI among the stages of  
14  
15 disease at baseline. We will construct Kaplan–Meier curves for the time to the development of  
16  
17 clinical endpoints by stage of disease at baseline, treating death as a competing risk.  
18  
19  
20  
21  
22  
23

## 24 Discussion

25  
26  
27 This protocol outlines the rationale and design for a multi-phase study including a cross-sectional  
28  
29 survey comparing two different screening methods for RHD quantifying the amount of disease,  
30  
31 followed by a cohort study addressing the impact of early implementation of secondary prevention.  
32  
33

34 The net primary school attendance rate in Nepal amounts to 86% and 82% for boys and girls,  
35  
36 respectively. [15] This study assesses the prevalence of RHD only to children of families who can  
37  
38 afford education, thus pointing out selection bias. Since access to education is a marker of socio-  
39  
40 economic status which at the same time represents a major determinant of susceptibility to ARF and  
41  
42 RHD, restriction of screening to school-going children is therefore likely to underestimate the real  
43  
44 disease burden related to RHD.  
45  
46

47 We anticipate certain challenges during the course of the study. Primarily, screening per se might  
48  
49 expose the children and their families to anxiety related to potential positive screening results  
50  
51 requiring long-term medical management. Additionally, we acknowledge the social stigma of being  
52  
53 diagnosed with a heart disease especially among girls in these communities. An information letter  
54  
55 distributed to the parents prior to screening, focus group discussions, and education programs will  
56  
57 condense clear and simple messages to allay fears regarding RHD and its subsequent management.  
58  
59  
60

1  
2  
3 Adequate knowledge and cultural sensitivity not to offend or harm the children and the parents'  
4 perception will be of prime importance and will be adhered to during the entire course of the  
5 project.  
6  
7  
8

9  
10 Even though the population attributable risk of RHD is expected to be high, false positive screening  
11 results may occur. In order to reduce false positive findings all echocardiographic clips with  
12 borderline or definite RHD will be assessed from two independent cardiologists. Moreover, screening  
13 in a large population of schoolchildren might yield in exceptional cases important incidental clinical  
14 findings unrelated to RHD but yet relevant for future prognosis (i.e. bicuspid aortic valve, atrial septal  
15 defect). Parents will be informed about such findings and advised on how to proceed for best  
16 medical management. If the parents or care-takers give their consent, the children will be invited for  
17 follow-up at BPKIHS for further work-up. First medical contact due to incidental findings relevant for  
18 future prognosis will be reimbursed.  
19  
20  
21  
22  
23  
24  
25  
26  
27  
28

29  
30 Prospective clinical studies investigating the impact of secondary prevention for subclinical RHD on  
31 long-term clinical outcome will be of central relevance for future health resource utilization in  
32 developing countries.  
33  
34  
35  
36  
37  
38  
39  
40  
41  
42  
43  
44  
45  
46  
47  
48  
49  
50  
51  
52  
53  
54  
55  
56  
57  
58  
59  
60

**Acknowledgement**

None

**Competing interests**

None

**Funding**

The study is supported by an unrestricted grant from the foundation “Coeur de la Tour”  
(<http://www.coeurdelatour.ch>) from Geneva, Switzerland.

**Data Sharing Statement**

There is no additional data available

## References

1. Carapetis JR, Currie BJ, Mathews JD. Cumulative incidence of rheumatic fever in an endemic region: a guide to the susceptibility of the population? *Epidemiol Infect* 2000;124:239-244.
2. Carapetis JR, McDonald M, Wilson NJ. Acute rheumatic fever. *Lancet* 2005;366(9480):155-68.
3. Seckeler MD, Hoke TR. The worldwide epidemiology of acute rheumatic fever and rheumatic heart disease. *Clin Epidemiol* 2011;3:67-87.
4. Marijon E, Ou P, Celermajer DS, et al. Prevalence of rheumatic heart disease detected by echocardiographic screening. *N Engl J Med* 2007;357:470-6.
5. Bhaya M, Panwar S, Beniwal R, et al. High prevalence of rheumatic heart disease detected by echocardiography in school children. *Echocardiography* 2009;27:448-453.
6. Saxena A, Ramakrishnan S, Roy A, et al. Prevalence and outcome of subclinical rheumatic heart disease in India: The RHEUMATIC (Rheumatic Heart Echo Utilization and Monitoring Actuarial Trends in Indian Children) study. *Heart* 2011;97:2018-2022.
7. Sadiq M, Islam K, Abid R, et al. Prevalence of rheumatic heart disease in school children in urban Lahore. *Heart* 2009;95:353-357.
8. Bahadur KC, Sharma D, Shrestha MP, et al. Prevalence of rheumatic and congenital heart disease in schoolchildren of Kathmandu valley in Nepal. *Indian Heart J* 2003;5(6):615-8.
9. Jose VJ, Gomathi M. Declining prevalence of rheumatic heart disease in rural schoolchildren in India: 2001-2002. *Indian Heart J* 2003;55(2):158-60.
10. Ahmed J, Mostafa Zaman M, Monzur Hassan MM. Prevalence of rheumatic fever and rheumatic heart disease in rural Bangladesh. *Trop Doct* 2005;35(3):160-1.
11. Periwal KL, Gupta BK, Panwar RB, et al. Prevalence of rheumatic heart disease in school children in Bikaner: an echocardiographic study. *J Assoc Physicians India* 2006;54:279-82.
12. Carapetis J, Parr J, Cherian T. Standardization of epidemiologic protocols for surveillance of post-streptococcal sequelae: acute rheumatic fever, rheumatic heart disease and acute post-



- 1  
2  
3 streptococcal glomerulonephritis. Department of Health and Human Services, National  
4  
5 Institutes of Health (online).  
6  
7 13. Remenyi B, Wilson N, Steer A, et al. World Heart Federation criteria for echocardiographic  
8  
9 diagnosis of rheumatic heart disease – an evidence-based guideline. *Nat Rev Cardiol* 2012;  
10  
11 epub ahead of print.  
12  
13 14. Pelajo CF, Lopez-Benitez JM, Torres JM, et al. Adherence to secondary prophylaxis and  
14  
15 disease recurrence in 536 Brazilian children with rheumatic fever. *Pediatr Rheumatol Online J*  
16  
17 2010;8:22.  
18  
19 15. UNICEF statistics 2005-2010. [www.unicef.org/infobycountry/nepal\\_nepal\\_statistics.html](http://www.unicef.org/infobycountry/nepal_nepal_statistics.html)  
20  
21 (accessed 16 Apr 2012).  
22  
23 16. Gerber MA, Baltimore RS, Eaton CB, et al. Prevention of rheumatic fever and diagnosis of  
24  
25 acute streptococcal pharyngitis. A scientific statement from the American Association of  
26  
27 Rheumatic fever, Endocarditis, and Kawasaki Disease Committee of the Council on Functional  
28  
29 Genomics and Translational Biology, and the Interdisciplinary Council on Quality of Care and  
30  
31 Outcomes Research: endorsed by the American Academy of Pediatrics. *Circulation*  
32  
33 2009;119:1541-51.  
34  
35 17. Guidelines for the diagnosis of rheumatic fever. Jones Criteria, 1992 update. Special Writing  
36  
37 Group of the Committee on Rheumatic Fever, Endocarditis, and Kawasaki Disease of the  
38  
39 Council on Cardiovascular Disease in the Young of the American Heart Association. *JAMA*  
40  
41 1992;268(15):2069-73.  
42  
43 18. Uzark K, Jones K, Slusher J, et al. Quality of life in children with heart disease as perceived by  
44  
45 children and parents. *Pediatrics* 2008;121:e1060.  
46  
47 19. Bennett S, Woods T, Liyanage WM, et al. A simplified general method for cluster-sample  
48  
49 survey of health in developing countries. *Wld Hlth Statist Quart* 1991;44:98-106.  
50  
51  
52  
53  
54  
55  
56  
57  
58  
59  
60



**Protocol for a Population-based Study of Rheumatic Heart Disease Prevalence and Cardiovascular Outcomes among Schoolchildren in Nepal**

|                                 |                                                                                                                                                                                                                                                                                                                                                     |
|---------------------------------|-----------------------------------------------------------------------------------------------------------------------------------------------------------------------------------------------------------------------------------------------------------------------------------------------------------------------------------------------------|
| Journal:                        | <i>BMJ Open</i>                                                                                                                                                                                                                                                                                                                                     |
| Manuscript ID:                  | bmjopen-2012-001320.R1                                                                                                                                                                                                                                                                                                                              |
| Article Type:                   | Protocol                                                                                                                                                                                                                                                                                                                                            |
| Date Submitted by the Author:   | 13-May-2012                                                                                                                                                                                                                                                                                                                                         |
| Complete List of Authors:       | Pilgrim, Thomas; Bern University Hospital, Kalesan, Bindu; Bern University Hospital, Karki, Prahlad; B.P. Koirala Institute of Health Sciences, Basnet, Anil; B.P. Koirala Institute of Health Sciences, Meier, Bernhard; Bern University Hospital, Urban, Philip; Hôpital de la Tour, Shrestha, Nikesh; B.P. Koirala Institute of Health Sciences, |
| <b>Primary Subject Heading</b>: | Cardiovascular medicine                                                                                                                                                                                                                                                                                                                             |
| Secondary Subject Heading:      | Epidemiology                                                                                                                                                                                                                                                                                                                                        |
| Keywords:                       | Echocardiography < CARDIOLOGY, Paediatric cardiology < CARDIOLOGY, Valvular heart disease < CARDIOLOGY                                                                                                                                                                                                                                              |
|                                 |                                                                                                                                                                                                                                                                                                                                                     |

SCHOLARONE™  
Manuscripts

1  
2  
3  
4  
5  
6  
7 **Protocol for a Population-based Study of Rheumatic Heart**  
8 **Disease Prevalence and Cardiovascular Outcomes among**  
9 **Schoolchildren in Nepal**~~Rheumatic Heart disease: Rationale~~  
10 ~~and Design of a Population-Based Study Protocol of~~  
11 ~~Prevalence and Cardiovascular Outcomes among~~  
12 ~~Schoolchildren in Nepal~~  
13  
14  
15  
16  
17  
18  
19  
20  
21  
22

Formatted: Font: Not Italic

23 Thomas Pilgrim, MD<sup>1\*</sup>, Bindu Kalesan, MPH<sup>1†</sup>, Prahlad Karki, MD<sup>‡</sup>, Anil Basnet, MD<sup>‡</sup>, Bernhard  
24 Meier, MD<sup>\*</sup>, Philip Urban, MD<sup>°</sup>, and Nikesh Raj Shrestha, MD<sup>‡</sup>

25  
26  
27 <sup>1</sup> equally contributing first authors  
28  
29  
30

31 \*Department of Cardiology, Swiss Cardiovascular Center Bern, Bern University Hospital, Bern,  
32 Switzerland; †Clinical Trials Unit, Department of Social and Preventive Medicine, Bern University,  
33 Bern, Switzerland; ‡Department of Internal Medicine and Cardiology, B.P. Koirala Institute of Health  
34 Sciences, Dharan, Nepal; °Hôpital de la Tour, Geneva, Switzerland  
35  
36  
37

38 ClinicalTrials.gov Identifier: NCT01550068  
39

40 Keywords: rheumatic heart disease, screening, schoolchildren  
41  
42  
43

44 Word Count: 38244186  
45  
46  
47  
48  
49  
50

51 Corresponding Author:

52 Thomas Pilgrim, MD  
53 Department of Cardiology  
54 Bern University Hospital  
55 Freiburgstrasse 10  
56 CH-3010 Bern  
57  
58  
59  
60

Switzerland  
Email: thomas.pilgrim@insel.ch  
Phone: +41 31 632 08 27  
Fax: +41 31 632 47 70

### Abstract

**Introduction:** Rheumatic heart disease (RHD) remains a major contributor to morbidity and mortality in developing countries. The reported prevalence rates of RHD are highly variable and mainly attributable to differences in the sensitivity of either clinical screening to detect advanced heart disease, or echocardiographic evaluation where disease is diagnosed earlier across a continuous spectrum. The clinical significance of diagnosis of subclinical RHD by echocardiographic screening and early implementation of secondary prevention has not been clearly established.

**Methods and Analysis:** We designed a cross-sectional survey to determine the prevalence of RHD in children from private and public schools between the age of 5 and 15 years in urban and rural areas of Eastern Nepal using both cardiac auscultation and echocardiographic evaluation. Children with RHD will be treated with secondary prevention and enrolled in a prospective cohort study. We will compare the prevalence rates by cardiac auscultation and echocardiography, determine risk factors associated with diagnosis and progression of RHD, investigate social and economic barriers for receiving adequate cardiac care, and assess clinical outcomes with regular medical surveillance as a function of stage of disease at the time of diagnosis. Prospective clinical studies investigating the impact of secondary prevention for subclinical RHD on long-term clinical outcome will be of central relevance for future health resource utilization in developing countries.

**Ethics and Dissemination:** The study was considered ethically uncritical and was given an exempt status by the ethics committee at University of Bern, Switzerland. The study has been submitted to the National Nepal Health Research Council (NHRC), and was registered with '[www.ClinicalTrials.gov](http://www.ClinicalTrials.gov)' (NCT01550068). The study findings will be reported in peer-reviewed publications.

1  
2  
3  
4  
5  
6  
7  
8  
9  
10  
11  
12  
13  
14  
15  
16  
17  
18  
19  
20  
21  
22  
23  
24  
25  
26  
27  
28  
29  
30  
31  
32  
33  
34  
35  
36  
37  
38  
39  
40  
41  
42  
43  
44  
45  
46  
47  
48  
49  
50  
51  
52  
53  
54  
55  
56  
57  
58  
59  
60

For peer review only

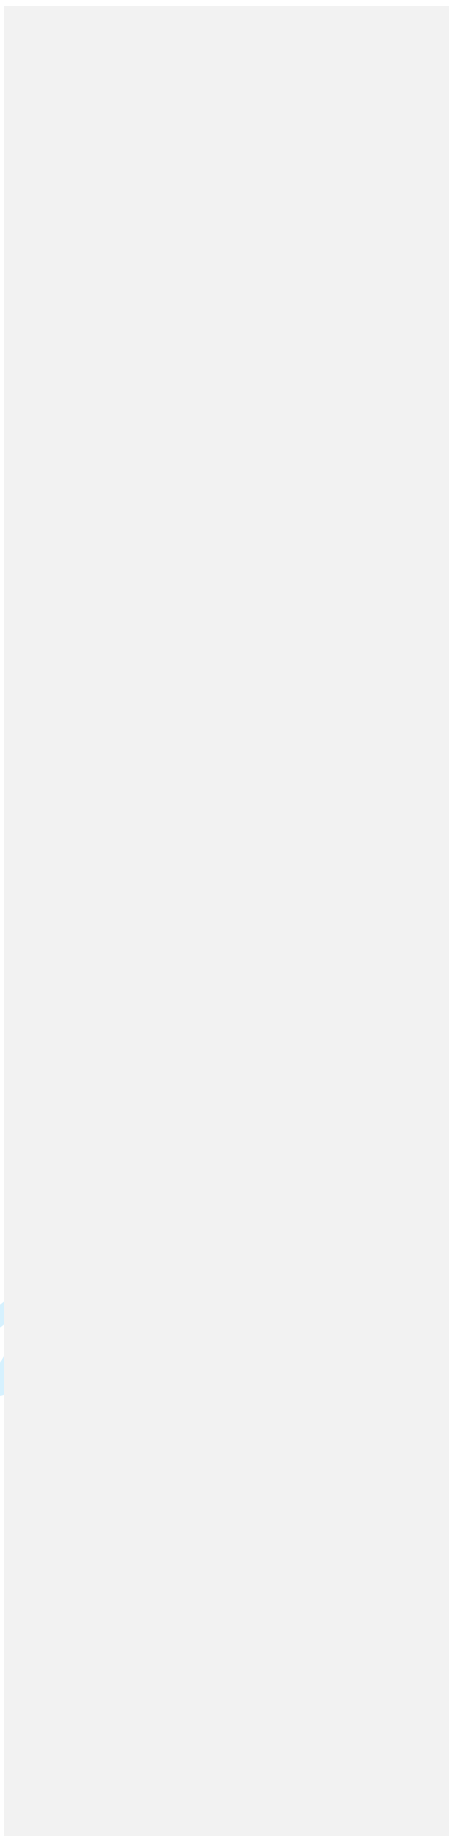

### Article Summary

#### Article focus:

- Study protocol of a population-based evaluation of the prevalence rate of rheumatic heart disease (RHD) among schoolchildren in Eastern Nepal, with a subsequent prospective longitudinal cohort study assessing long-term clinical outcome of children undergoing secondary prevention for borderline and definite RHD according to the World Heart Federation criteria.

#### Key messages:

- RHD remains a major contributor to morbidity and mortality in developing countries.
- Echocardiographic screening allows diagnosis of RHD at an earlier stage across a continuous spectrum as compared to cardiac auscultation.
- The clinical significance of diagnosis of subclinical RHD by echocardiographic screening and early implementation of secondary prevention has not been clearly established.

#### Strengths and limitations of this study:

- The protocol describes a comprehensive approach to implement echocardiographic screening in a high prevalence region as recommended by the World Health Organization, and outlines a robust analysis plan to investigate clinical outcome with secondary prevention for subclinical RHD.
- Since access to education is a marker of socio-economic status, restriction of screening to school-going children is subjected to selection bias likely to underestimate the real disease burden related to RHD in Eastern Nepal.

1  
2  
3  
4  
5  
6  
7  
8  
9  
10  
11  
12  
13  
14  
15  
16  
17  
18  
19  
20  
21  
22  
23  
24  
25  
26  
27  
28  
29  
30  
31  
32  
33  
34  
35  
36  
37  
38  
39  
40  
41  
42  
43  
44  
45  
46  
47  
48  
49  
50  
51  
52  
53  
54  
55  
56  
57  
58  
59  
60

- Cultural sensitivity with education programs and focus group discussions will anticipate the potential social stigma of a diagnosis with a heart condition during childhood, and increase public awareness.

For peer review only



## Introduction

Rheumatic fever complicated by rheumatic heart disease (RHD) remains a major contributor to morbidity and premature death among the socio-economically underprivileged working age population of developing countries. [1] RHD results from an autoimmune response due to molecular mimicry between the M-protein on the group A  $\beta$ -hemolytic streptococci cell membrane and cardiac myosin eventually leading to valvular damage. [2] High prevalence rates of acute rheumatic fever (ARF) and RHD have been reported from different geographic regions around the world such as Southeast Asia, the Western Pacific and Africa that share demographic characteristics determined by poverty and limited access to health care resources. [3] The burden of RHD is likely to escalate in these countries due to increasing urbanization and overcrowding.

Prevalence rates of RHD from screening studies in Southeast Asian countries range from 0.7 to 22 per 1000 children using traditional cardiac auscultation, and from 20 to 51 per 1000 children using echocardiography [4-11]. A considerable variation in prevalence rates reflects the substantially higher sensitivity of echocardiographic screening as compared to cardiac auscultation due to diagnosis across a continuous spectrum of disease as opposed to presence or absence of a heart murmur using cardiac auscultation. Echocardiographic screening for RHD has been recommended by the World Health Organization (WHO) in high prevalence regions, [12] and the recently released criteria for echocardiographic diagnosis of RHD by the World Heart Federation (WHF) warrant consistent reporting and facilitate the evaluation of progression of minor echocardiographic lesions over time. [13] The diagnosis of RHD at an earlier, clinically silent stage by the detection of morphological and functional valvular lesions without a corresponding heart murmur challenges our current concept of prevention and treatment.

Medical management of ARF and RHD largely depends upon preventive measures comprising reduction of overcrowding, prompt antibiotic treatment of streptococcal pharyngitis, and secondary prevention achieved by regular oral or intramuscular administration of penicillin continued until early



1  
2  
3  
4  
5  
6  
7 adulthood among children with a documented history of ARF or evidence of RHD. Even though  
8 preventive measures with penicillin are inexpensive and efficient, this strategy is difficult to  
9 effectuate in developing countries with limited access to health care resources. Enrollment of  
10 patients with ARF and RHD in a registry with close follow-up has been demonstrated to reduce the  
11 cardiovascular sequelae associated with disease progression. [14]  
12  
13  
14

15  
16 Effective measures to reduce the global burden of RHD represent an ongoing challenge involving  
17 reduction in overcrowding, improving hygiene, increasing public awareness and facilitating access to  
18 health care. In the absence of fundamental socio-economic changes improving primordial  
19 prevention, systematic screening for RHD based on public and private education represents the most  
20 comprehensive approach and aims at a reduction of the late complications of RHD by early  
21 implementation of secondary prevention. Current research has been predominantly focused on  
22 assessing prevalence rates using passive survey systems without subsequent enrolment in registries  
23 or offering longitudinal follow-up. In order to assess the determinants of disease and its progression  
24 along with short- and long-term clinical outcomes, we plan to include all cases of RHD in a cohort  
25 study to be treated according to their disease stage at diagnosis and followed up for at least 5 years.  
26  
27  
28  
29  
30  
31  
32  
33  
34  
35  
36  
37  
38

### 39 **Aims and Objectives**

40  
41 The objective of this study is to investigate the prevalence rate of definite and borderline RHD among  
42 children in Eastern Nepal, and to assess long-term clinical outcome of children undergoing secondary  
43 antibiotic prevention for RHD. More specifically, we aim to (a) compare the prevalence rates by  
44 cardiac auscultation and echocardiography, (b) determine risk factors associated with diagnosis and  
45 progression of RHD, (c) investigate social and economic barriers for receiving adequate cardiac care,  
46 and (d) assess clinical outcomes as a function of stage of disease at the time of diagnosis with regular  
47 medical surveillance.  
48  
49  
50  
51  
52  
53  
54  
55  
56  
57  
58  
59  
60

## Methods

### *Study Design and Setting*

A cross-sectional survey of schoolchildren in the Sunsari district of Eastern Nepal will be performed to identify children with RHD; and those with evidence of disease will subsequently be enrolled in a prospective longitudinal cohort study for a period of five years. The Sunsari district situated on the foothills of the Lower Himalayan Range in Eastern Nepal involves 52 villages with a total population of around 630,000 inhabitants. Dharan is the largest city in the Sunsari district and the third largest city in the country.

### *Cross-Sectional Survey*

We will perform clinical and echocardiographic screening of children aged 5-15 years from public and private schools in urban and rural areas in Eastern Nepal. A multistage sampling procedure will be used to select the study sample. In order to ensure a representative target population, the location and administration of the schools will be used as a surrogate to reflect the socio-economic demographic distribution of the population in Eastern Nepal~~The location and administration of the schools will be used as a surrogate to reflect the socio-economic demographic distribution of the population in Eastern Nepal.~~ Since approximately eighty percent of the population in Nepal lives in rural areas, [15] we will include three rural and one urban area in Eastern Nepal, and enroll one third of the patients from the urban area from private schools.

Formatted: Font: Not Italic, Not Highlight

### *Prospective Cohort Study*

All children with documented history of ARF and/or echocardiographic evidence of RHD will be re-examined in regular time intervals, at six months, at one year, and yearly thereafter up to at least 5 years, in the context of a prospective cohort study~~All children with documented history of ARF and/or echocardiographic evidence of RHD will be re-examined in regular time intervals in the context of a prospective cohort study.~~ Both children and their primary caregivers will be educated in

Formatted: Font: Not Italic

1  
2  
3  
4  
5  
6  
7 order to ensure compliance with secondary prevention and regular follow-up. A standardized  
8 questionnaire will address clinical symptoms, compliance to treatment, and assess pre-specified  
9 clinical endpoints. Echocardiographic follow-up will be performed yearly up to five years at B.P.  
10 Koirala Institute of Health Sciences (BPKIHS).  
11  
12  
13

#### 14 15 16 17 18 19 *Study Population*

20  
21 For the cross-sectional survey, all parents of the schoolchildren will be informed by a letter  
22 distributed to the children outlining the project details and indicating a contact address for queries.  
23 Since close to half of the adult population in Nepal is illiterate, [15] focus group discussions with the  
24 health care providers, school principals, local health care workers and parents will be offered to  
25 understand and establish initiatives to win the confidence of the communities. A written informed  
26 consent form of the principal of each of the selected schools will be obtained. Schoolchildren of  
27 parents that do not actively withdraw consent for screening will be examined. Inclusion criteria for  
28 the observational survey will be as follows: age 5-15 years (1), written informed consent for  
29 participation in the screening study by the school principal (2), and passive consent from the  
30 parent/primary caregiver of the children (3). Given the observational design of the study no formal  
31 exclusion criteria apply. Children will be enrolled in the prospective registry in the presence of a  
32 documented history of ARF or echocardiographic evidence of definite or borderline RHD, and written  
33 informed consent given by the children and/or their parents/primary caregivers.  
34  
35  
36  
37  
38  
39  
40  
41  
42  
43  
44  
45

#### 46 47 *Data Collection*

48  
49 A questionnaire customized to the age of the children will acquire data on social background and  
50 past medical history in a standardized interview. Demographic variables such as age, household  
51 characteristics, and socio-economic indicators will be recorded along with a short medical history  
52 followed by physical examination documenting height, weight, and potential clinical signs of ARF.  
53  
54  
55  
56  
57  
58  
59  
60

1  
2  
3  
4  
5  
6  
7 Screening for RHD will be performed independently by cardiac auscultation to detect pathologic  
8 heart murmurs, as well as by echocardiography to document morphologic and/or functional valvular  
9 lesions consistent with RHD. All data will be recorded in a dedicated web-based database.  
10  
11

### 12 *Treatment*

13  
14 All patients enrolled in the RHD cohort will be treated with a standard antibiotic regimen for  
15 secondary prevention consisting of intramuscular administration of weight-adjusted penicillin G  
16 benzathine every 3-4 weeks, or daily oral administration of penicillin V for the entire duration of  
17 follow-up. Patients allergic to penicillin will be treated with daily oral administration of azithromycin.  
18  
19  
20  
21

22 [16]  
23

### 24 *Definitions*

25  
26 ARF will be defined by the modified Jones criteria. [17] Echocardiographic diagnosis will classify RHD  
27 according to the WHF criteria for individuals aged  $\leq 20$  years into definite and borderline. Definite  
28 RHD is further subdivided into four subcategories. Subcategory A is pathological mitral regurgitation  
29 and at least two morphological features of RHD of the mitral valve, subcategory B is the presence of  
30 mitral stenosis with a mean gradient of  $\geq 4$  mmHg. Subcategory C is defined by pathological aortic  
31 regurgitation in combination with at least two morphological features of RHD of the aortic valve, and  
32 subcategory D is determined by borderline disease of both the aortic valve and the mitral valve.  
33  
34 Borderline RHD is subdivided into three subcategories. Subcategory A is the presence of at least two  
35 morphological features of RHD of the mitral valve without pathological mitral regurgitation or mitral  
36 stenosis, subcategories B and C are determined by pathological mitral regurgitation, or pathological  
37 aortic regurgitation, respectively. Physiological mitral regurgitation (A), physiological aortic  
38 regurgitation (B), and an isolated morphological feature of RHD of the mitral or aortic valve (i.e.  
39 valvular thickening) without any associated pathological stenosis or regurgitation (C and D,  
40 respectively) will be classified as normal echocardiographic findings. [13]  
41  
42  
43  
44  
45  
46  
47  
48  
49  
50  
51  
52  
53  
54  
55  
56  
57  
58  
59  
60

1  
2  
3  
4  
5  
6  
7 A patient will be defined as adherent to secondary prevention if he/she receives at least 80% of the  
8 prescribed intramuscular antibiotic administration captured from hospital records. In patients  
9 receiving oral antibiotics, adherence will be assessed by self-report and by pill counts at every follow  
10 up visit. Other treatment adherence end points will be frequency of follow-up appointments and  
11 follow-up status.  
12  
13

14  
15  
16 Quality of life will be assessed using PedsQL generic core and cardiac module scales. PedsQL  
17 addresses the child's perspectives across the widest possible age range. The generic module scale  
18 encompass physical functioning (8 items), emotional functioning (5 items), social functioning (5  
19 items), and school functioning (5 items). The PedsQL cardiac module has 5 scales related to  
20 symptoms (7 items), perceived physical appearance (3 items), treatment anxiety (4 items), cognitive  
21 problems (5 items), and communication (3 items). [18]  
22  
23  
24  
25  
26  
27

#### 28 *Outcomes and Treatment Effect*

29  
30  
31 Clinical outcomes such as all-cause mortality, stroke, endocarditis, hospitalization for congestive  
32 heart failure, valvular surgery, mitral balloon valvuloplasty, and recurrence of rheumatic fever will be  
33 recorded among patients with RHD enrolled in the longitudinal cohort study. Additionally, we will  
34 obtain time varying covariates like socioeconomic parameters, adherence to treatment and  
35 information on quality of life.  
36  
37  
38  
39

40  
41 We anticipate that compliance with secondary prevention will be one of the major challenges, which  
42 in turn requires continued education. We plan to ensure compliance by means of face-to-face  
43 education by the research coordinator at each visit to both the child and the caregiver, making them  
44 aware of the risk of recurrence of rheumatic fever and the potential consequences of progression of  
45 rheumatic heart disease. Visit reminders by mail and if necessary by personal visits will also be used  
46 to ensure adequate compliance.  
47  
48  
49  
50  
51

52 Primary caregivers will be educated to detect symptoms and signs of potential allergic reactions of  
53 antibiotic treatment such as a skin rash, hives, swollen lips/tongue and wheezing , and will be  
54  
55  
56  
57  
58  
59  
60

Formatted: Normal, Justified

Formatted: Font: Not Italic

Formatted: Normal, Justified

1  
2  
3  
4  
5  
6  
7 provided with an emergency medical contact number. In case of drug-related adverse side effects  
8 such as diarrhea, nausea, pain/swelling/infection at the site of injection, we will recommend to  
9 switch the antibiotic administration from intramuscular to oral or vice versa as a first step. If  
10 children/caregivers refuse regular antibiotic intake despite counseling, they will have the option to  
11 retract their decision at any given point in time. With their consent, these children will remain in the  
12 registry in order to provide care and treatment in case of potential late-complications as a  
13 consequence of disease progression. In the event of children being diagnosed at an advanced stage  
14 with significant valvular heart disease leading to congestive heart failure, we will assure optimal  
15 interdisciplinary medical treatment.

Formatted: Font: Not Italic

#### Quality Assurance

26  
27  
28  
29 All data will be checked for completeness and plausibility before being entered into a web-based data  
30 entry system. Positive screening results will be verified in the cardiology outpatient clinic of BPKIHS by

Formatted: Plain Text, Left, Space Before: 0 pt, After: 0 pt

31  
32 complete echocardiographic examination. Quality assurance of the data will be ensured in a two-tiered

Formatted: Font: 11 pt, Not Italic

33 fashion. First of all, the web-based data entry system will not allow for entering implausible values

34 and text fields will be minimal and restricted to specification of "other". The second tier will be

35 automated monthly reports which generates denominator along with the total frequencies. When

36 missing data is identified, the research coordinator will identify the field by means of querying and

37 will try to obtain the values from records or if necessary back to the participant within one month of

Formatted: Font: 11 pt, Not Italic

38 last contact. The database will be backed up every week for further security on to a dedicated data

39 server. Regular monthly reports will be generated for patient follow up visits and clinical outcome

40 assessment. Biannual reports will be submitted to the foundation "Coeur de la Tour" in Geneva,

41 Switzerland. The study will be conducted in compliance with the Declaration of Helsinki.

42  
43 The study was registered with clinical trials.gov (NCT01550068) and was given an exempt status by

44 the ethics committee at University of Bern, Switzerland (KEK-BE 018/12). The study protocol has

45 been submitted to the National Nepal Health Research Council (NHRC). The study is supported by an

1  
2  
3  
4  
5  
6  
7 unrestricted grant from the foundation “Coeur de la Tour” (<http://www.coeurdelatour.ch>) from  
8 Geneva, Switzerland.

Field Code Changed

### 10 Statistical Considerations

#### 13 *Sample Size*

15 Sample size calculations were based on reported prevalence rates of RHD using cardiac auscultation  
16 in schoolchildren in Southeast Asian countries. [4-11] We calculated a sample size of 9500  
17 schoolchildren between the ages of 5 to 15 years with a type I error of 0.05 and a power of 90% for  
18 an expected diagnosis rate of 2 per 1000. The lower end of the prevalence estimates was chosen in  
19 order to obtain a sufficient sample size in the subsequent cohort study, and to be able to provide  
20 optimal treatment to a maximum number of affected children. We will include one urban and three  
21 rural areas from the different parts of the target area (Sunsari district), thus including 2,500  
22 participants in each area. One third of the patients from the urban area will be enrolled from private  
23 schools.  
24  
25  
26  
27  
28  
29  
30  
31

#### 33 *Data Analysis Plan*

35 In the cross-sectional study, age and sex specific prevalence rates for RHD will be calculated by socio-  
36 demographic covariates. The design effect of the cluster sampling strategy will then be calculated  
37 using the variations of prevalence rates among the different clusters. [19] A multiplication factor  
38 equal to the square root of the design effect will be used to construct the 95% confidence intervals  
39 (CIs) for the prevalence estimates to avoid erroneously narrow confidence intervals (CI). Prevalence  
40 rates with 95% CI will be calculated separately for the two screening methods. Multivariable analysis  
41 will be performed for assessing the socio-economic factors for RHD. Among children with RHD, the  
42 socio-economic barriers to receive adequate medical care will be assessed by using a multivariate  
43 logistic regression model. Furthermore, the association of RHD with age, gender, socio-economic  
44 status, and urban–rural residence will be evaluated with univariate and multivariate analyses.  
45  
46  
47  
48  
49  
50  
51  
52  
53  
54  
55  
56  
57  
58  
59  
60

1  
2  
3  
4  
5  
6  
7 Cohort baseline characteristics and procedural variables will be presented as counts and percentages  
8 for dichotomous variables and as mean and standard deviation (SD) for continuous variables. Factor  
9 analysis of the scales in QOL will be performed using appropriate rotations and index scores of the  
10 constructs will be computed if not more than 25% of the items are missing. Adherence to treatment  
11 will be measured as a dichotomous variable and quality of life (QOL) scores as mean (SD) / median  
12 (interquartile range) will be presented for each follow up time interval. We will present and compare  
13 the baseline and procedural characteristics by the stages of disease progression at baseline using chi-  
14 square tests or analyses of variance. Comparisons of the baseline characteristics of the study subjects  
15 among the disease stages at baseline will be performed using linear or logistic regression. For the  
16 specific clinical endpoints, compliance and QOL univariable and multivariable Cox proportional  
17 hazard regression models will be used to calculate hazard ratios with 95% CI among the stages of  
18 disease at baseline. We will construct Kaplan–Meier curves for the time to the development of  
19 clinical endpoints by stage of disease at baseline, treating death as a competing risk.  
20  
21  
22  
23  
24  
25  
26  
27  
28  
29  
30  
31  
32  
33

### 34 Discussion

35  
36  
37 This protocol outlines the rationale and design for a multi-phase study including a cross-sectional  
38 survey comparing two different screening methods for RHD quantifying the amount of disease,  
39 followed by a cohort study addressing the impact of early implementation of secondary prevention.  
40  
41

42  
43 The net primary school attendance rate in Nepal amounts to 86% and 82% for boys and girls,  
44 respectively. [15] This study assesses the prevalence of RHD only to children of families who can  
45 afford education, thus pointing out selection bias. Since access to education is a marker of socio-  
46 economic status which at the same time represents a major determinant of susceptibility to ARF and  
47 RHD, restriction of screening to school-going children is therefore likely to underestimate the real  
48 disease burden related to RHD.  
49  
50  
51  
52  
53  
54  
55  
56  
57  
58  
59  
60



1  
2  
3  
4  
5  
6  
7 We anticipate certain challenges during the course of the study. Primarily, screening per se might  
8 expose the children and their families to anxiety related to potential positives screening results  
9 requiring long-term medical management. Additionally, we acknowledge the social stigma of being  
10 diagnosed with a heart disease especially among girls in these communities. An information letter  
11 distributed to the parents prior to screening, focus group discussions, and education programs will  
12 condense clear and simple messages to allay fears regarding RHD and its subsequent management.  
13 Adequate knowledge and cultural sensitivity not to offend or harm the children and the parents'  
14 perception will be of prime importance and will be adhered to during the entire course of the  
15 project.  
16  
17

18  
19  
20  
21  
22  
23  
24 Even though the population attributable risk of RHD is expected to be high, false positive screening  
25 results may occur. In order to reduce false positive findings all echocardiographic clips with  
26 borderline or definite RHD will be assessed from two independent cardiologists. Moreover, screening  
27 in a large population of schoolchildren might yield in exceptional cases important incidental clinical  
28 findings unrelated to RHD but yet relevant for future prognosis (i.e. bicuspid aortic valve, atrial septal  
29 defect). Parents will be informed about such findings and advised on how to proceed for best  
30 medical management. If the parents or care-takers give their consent, the children will be invited for  
31 follow-up at BPKIHS for further work-up. First medical contact due to incidental findings relevant for  
32 future prognosis will be reimbursed.  
33  
34  
35  
36  
37  
38  
39

40  
41  
42 Prospective clinical studies investigating the impact of secondary prevention for subclinical RHD on  
43 long-term clinical outcome will be of central relevance for future health resource utilization in  
44 developing countries.  
45  
46  
47  
48  
49  
50  
51  
52  
53  
54  
55  
56  
57  
58  
59  
60

**Acknowledgement**

None

**Competing interests**

None

**Funding**

The study is supported by an unrestricted grant from the foundation "Coeur de la Tour"

<http://www.coeurdelatour.ch> from Geneva, Switzerland.

Field Code Changed

**Data Sharing Statement**

There is no additional data available

## References

1. Carapetis JR, Currie BJ, Mathews JD. Cumulative incidence of rheumatic fever in an endemic region: a guide to the susceptibility of the population? *Epidemiol Infect* 2000;124:239-244.
2. Carapetis JR, McDonald M, Wilson NJ. Acute rheumatic fever. *Lancet* 2005;366(9480):155-68.
3. Seckeler MD, Hoke TR. The worldwide epidemiology of acute rheumatic fever and rheumatic heart disease. *Clin Epidemiol* 2011;3:67-87.
4. Marijon E, Ou P, Celermajer DS, et al. Prevalence of rheumatic heart disease detected by echocardiographic screening. *N Engl J Med* 2007;357:470-6.
5. Bhaya M, Panwar S, Beniwal R, et al. High prevalence of rheumatic heart disease detected by echocardiography in school children. *Echocardiography* 2009;27:448-453.
6. Saxena A, Ramakrishnan S, Roy A, et al. Prevalence and outcome of subclinical rheumatic heart disease in India: The RHEUMATIC (Rheumatic Heart Echo Utilization and Monitoring Actuarial Trends in Indian Children) study. *Heart* 2011;97:2018-2022.
7. Sadiq M, Islam K, Abid R, et al. Prevalence of rheumatic heart disease in school children in urban Lahore. *Heart* 2009;95:353-357.
8. Bahadur KC, Sharma D, Shrestha MP, et al. Prevalence of rheumatic and congenital heart disease in schoolchildren of Kathmandu valley in Nepal. *Indian Heart J* 2003;5(6):615-8.
9. Jose VJ, Gomathi M. Declining prevalence of rheumatic heart disease in rural schoolchildren in India: 2001-2002. *Indian Heart J* 2003;55(2):158-60.
10. Ahmed J, Mostafa Zaman M, Monzur Hassan MM. Prevalence of rheumatic fever and rheumatic heart disease in rural Bangladesh. *Trop Doct* 2005;35(3):160-1.
11. Periwal KL, Gupta BK, Panwar RB, et al. Prevalence of rheumatic heart disease in school children in Bikaner: an echocardiographic study. *J Assoc Physicians India* 2006;54:279-82.
12. Carapetis J, Parr J, Cherian T. Standardization of epidemiologic protocols for surveillance of post-streptococcal sequelae: acute rheumatic fever, rheumatic heart disease and acute post-

- 1  
2  
3  
4  
5  
6  
7 streptococcal glomerulonephritis. Department of Health and Human Services, National  
8 Institutes of Health (online).  
9
- 10 13. Remenyi B, Wilson N, Steer A, et al. World Heart Federation criteria for echocardiographic  
11 diagnosis of rheumatic heart disease – an evidence-based guideline. *Nat Rev Cardiol* 2012;  
12 epub ahead of print.  
13  
14  
15
- 16 14. Pelajo CF, Lopez-Benitez JM, Torres JM, et al. Adherence to secondary prophylaxis and  
17 disease recurrence in 536 Brazilian children with rheumatic fever. *Pediatr Rheumatol Online J*  
18 2010;8:22.  
19  
20
- 21 15. UNICEF statistics 2005-2010. [www.unicef.org/infobycountry/nepal\\_nepal\\_statistics.html](http://www.unicef.org/infobycountry/nepal_nepal_statistics.html)  
22 (accessed 16 Apr 2012).  
23  
24
- 25 16. Gerber MA, Baltimore RS, Eaton CB, et al. Prevention of rheumatic fever and diagnosis of  
26 acute streptococcal pharyngitis. A scientific statement from the American Association of  
27 Rheumatic fever, Endocarditis, and Kawasaki Disease Committee of the Council on Functional  
28 Genomics and Translational Biology, and the Interdisciplinary Council on Quality of Care and  
29 Outcomes Research: endorsed by the American Academy of Pediatrics. *Circulation*  
30 2009;119:1541-51.  
31  
32
- 33 17. Guidelines for the diagnosis of rheumatic fever. Jones Criteria, 1992 update. Special Writing  
34 Group of the Committee on Rheumatic Fever, Endocarditis, and Kawasaki Disease of the  
35 Council on Cardiovascular Disease in the Young of the American Heart Association. *JAMA*  
36 1992;268(15):2069-73.  
37  
38
- 39 18. Uzark K, Jones K, Slusher J, et al. Quality of life in children with heart disease as perceived by  
40 children and parents. *Pediatrics* 2008;121:e1060.  
41  
42
- 43 19. Bennett S, Woods T, Liyanage WM, et al. A simplified general method for cluster-sample  
44 survey of health in developing countries. *Wld Hlth Statist Quart* 1991;44:98-106.  
45  
46  
47  
48  
49  
50  
51  
52  
53  
54  
55  
56  
57  
58  
59  
60

Field Code Changed
